# Supplementary material for: Nucleoplasmic lamins define growth-regulating functions of lamina-associated polypeptide 2α in progeria cells
Source: PubMed Central journal article supplement (PMC5826045; doi:10.1242/jcs.208462), 2018-02-01
Supplement: joces-131-208462-s1.pdf [file joces-131-208462-s1.pdf]

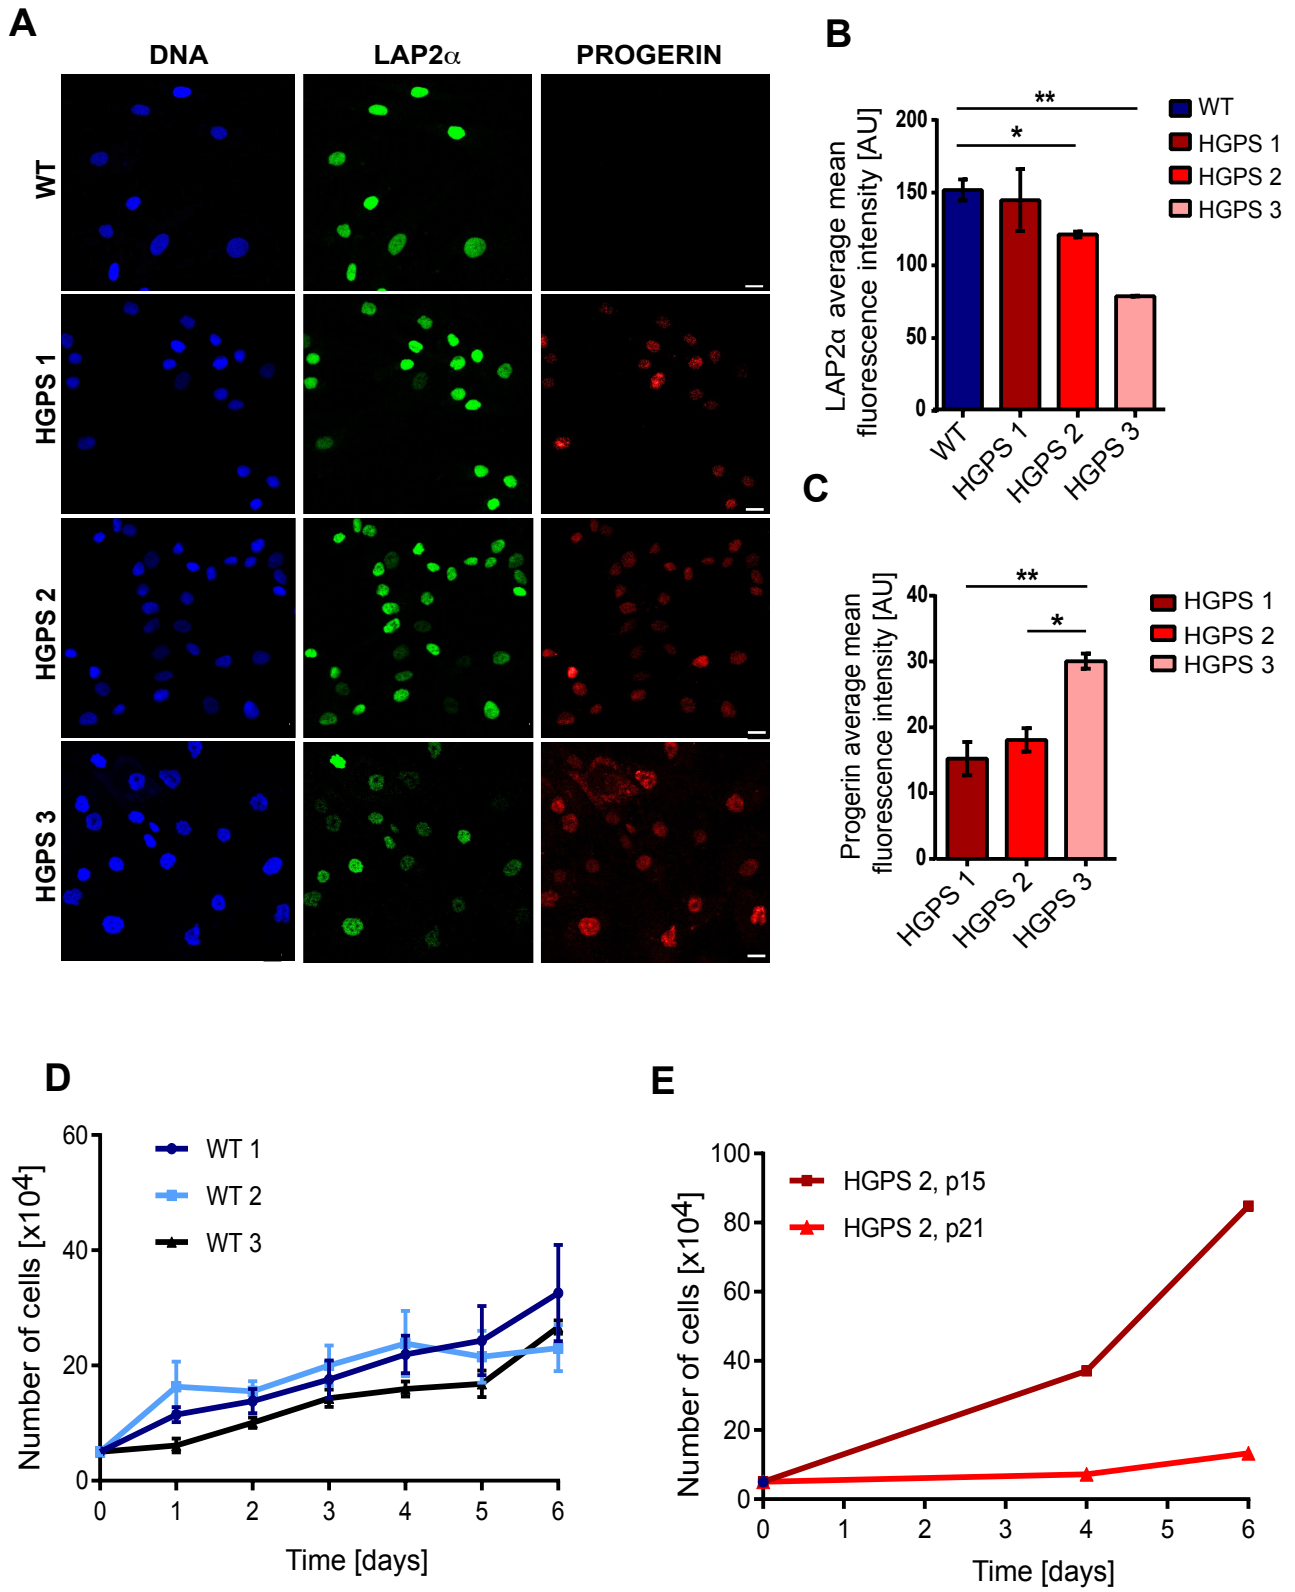

**Figure S1. LAP2 $\alpha$  is downregulated in HGPS fibroblasts.** (A) Primary human fibroblasts were fixed with 4% PFA and processed for immunofluorescence using anti LAP2 $\alpha$  antibody (green) and progerin antibody (red). DNA was stained with DAPI (blue). Scale bar: 20 $\mu$ m. (B) Average mean LAP2 $\alpha$  fluorescence intensities of one wild-type (WT 1) and three different HGPS primary human fibroblast cell lines (HGPS 1, 2 and 3) were measured in 250 nuclei each and plotted in a histogram (n=3). (C) One wild-type (WT 1) and three different HGPS primary human fibroblast cell lines (HGPS 1, 2 and 3) were stained with anti-progerin antibody. Average mean progerin fluorescence intensities were measured in 250 nuclei each and plotted in a histogram (n=3). (D) Growth curves of a three different WT cell lines (p17) over 6 days (n=3). (E) Growth curves of HGPS 2 cell line at middle (p15) and late (p21) passage (n=3).

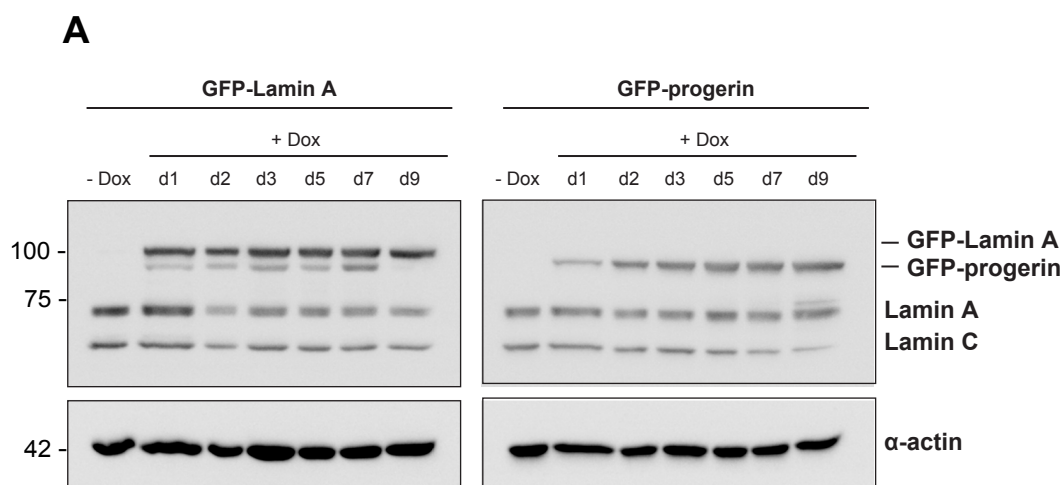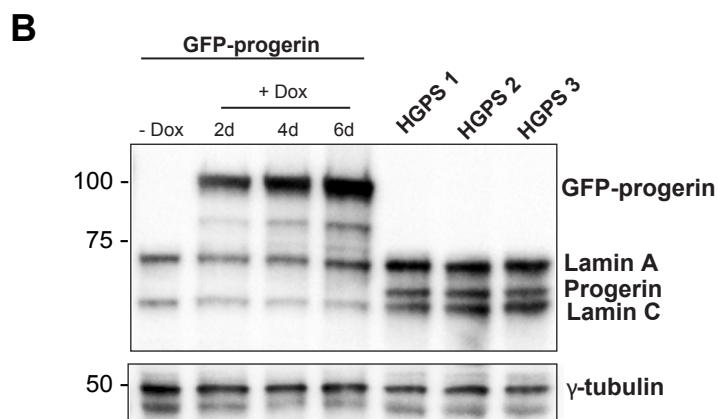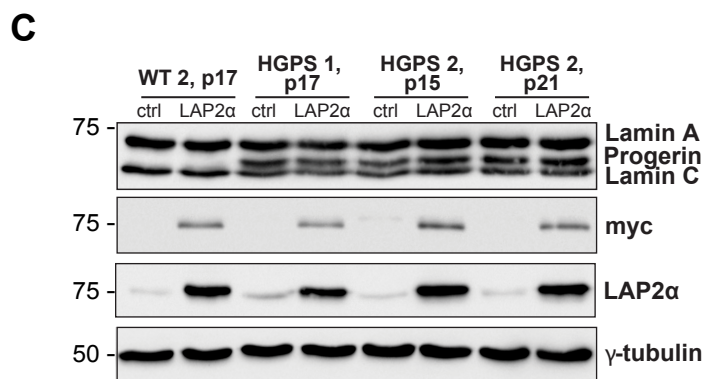

**Figure S2. Immunoblot analysis of hTERT TetOn cells and primary human fibroblasts.**

**(A)** Immunoblot analysis of total cell lysates of GFP-Lamin A and GFP-progerin expressing cells at different time-points after induction with  $0.5 \mu\text{g ml}^{-1}$  doxycycline using anti-lamin A/C antibody.  $\alpha$ -ctin levels served as a loading control. **(B)** Immunoblot analysis of GFP-progerin cells at different time-points of induction with  $1.0 \mu\text{g ml}^{-1}$  doxycycline and primary HGPS-derived fibroblasts using anti-lamin A/C antibody.  $\gamma$ -tubulin served as a loading control. **(C)** Immunoblot analysis of one wild-type and three different HGPS cell lines using anti-lamin A/C, anti-myc and anti-LAP2 $\alpha$  antibodies following lentiviral transfections with myc-tagged human LAP2 $\alpha$  or GFP (ctrl) plasmids.  $\gamma$ -tubulin levels served as a loading control.

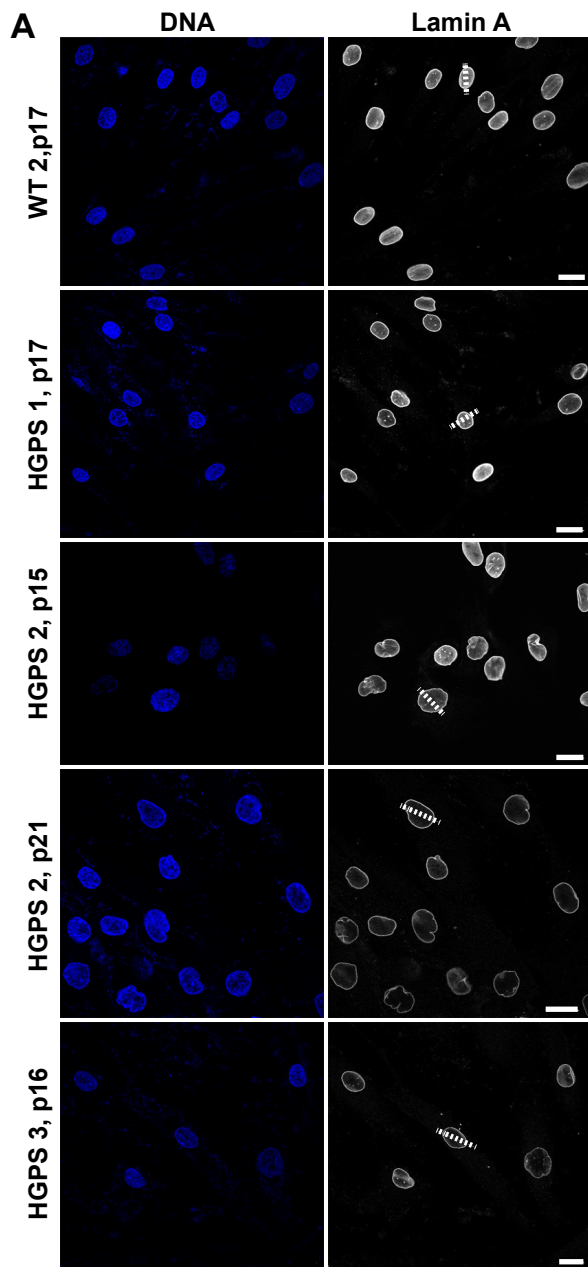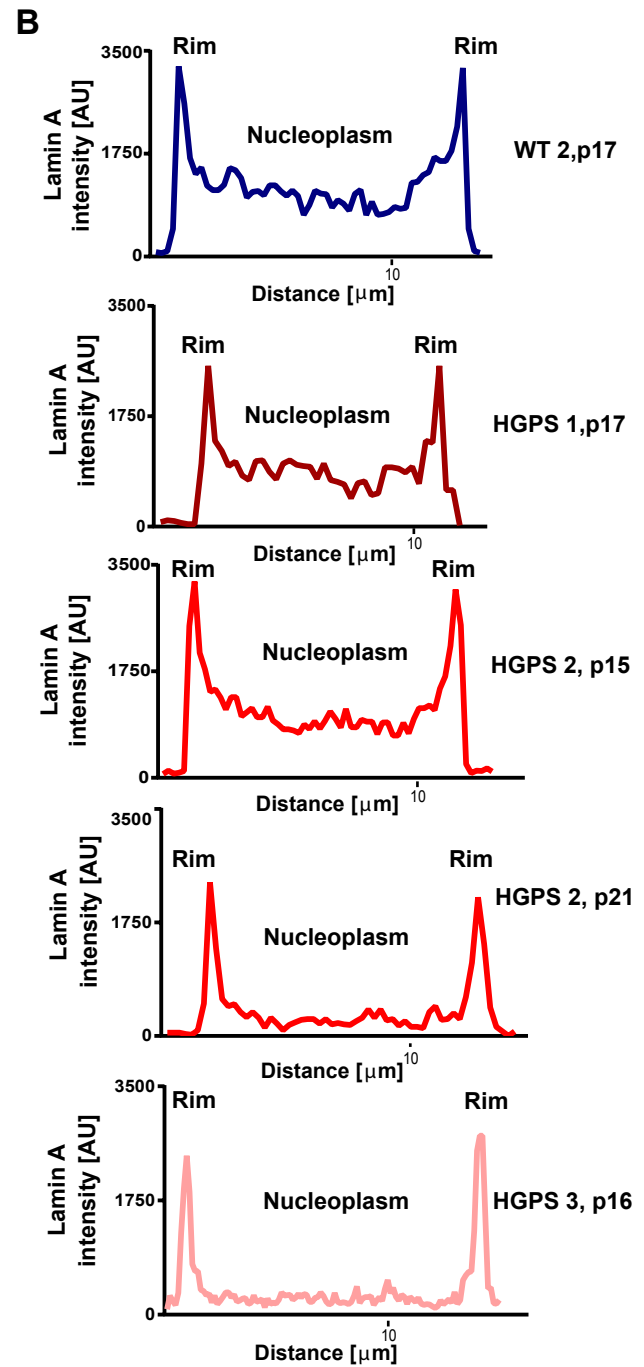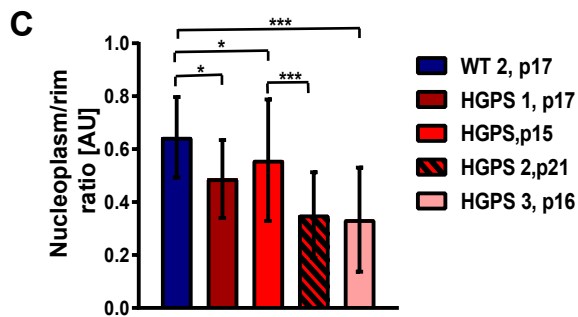

**Figure S3. Nucleoplasmic pool of A-type lamins is not affected in low progerin-expressing cells.** (A) Primary human fibroblasts were fixed with 4% PFA and processed for immunofluorescence using antibody specifically recognizing lamin A, not lamin C or progerin. DNA was stained with DAPI (blue). Scale bar: 20  $\mu$ m. (B) Fluorescence intensity of the lamin A signal was measured across nuclei (dotted line) and plotted. (C) Nucleoplasmic over rim ratio of the lamin A staining was measured in 100 nuclei each of one wild-type and three different HGPS cell lines and plotted in a histogram.

**A**

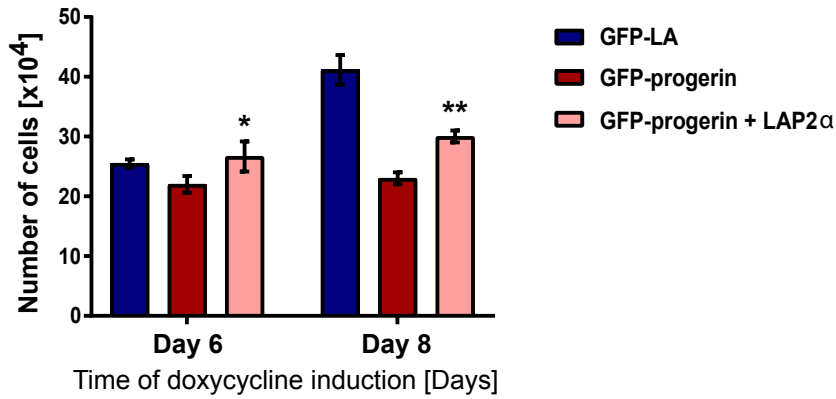

**B**

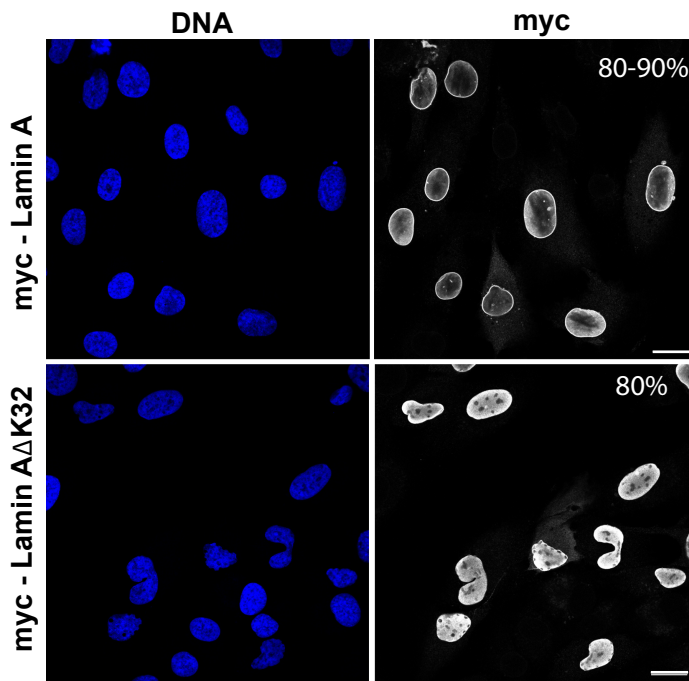

**C**

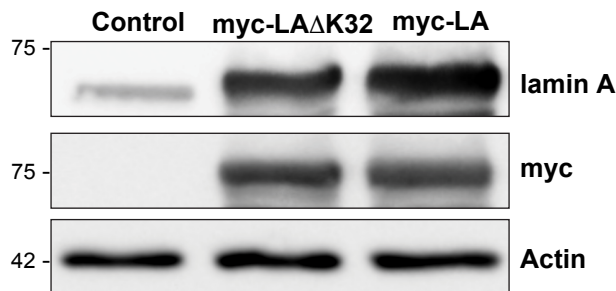

**D**

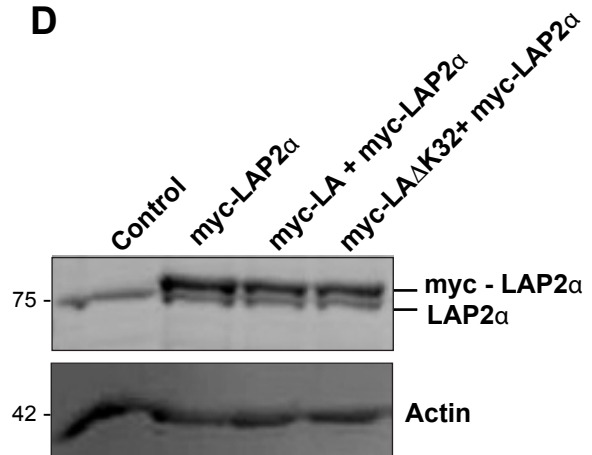

**Figure S4. Ectopic expression of human myc-Lamin A, human myc-Lamin $\Delta$ K32 and human myc-LAP2 $\alpha$  in hTERT-immortalized skin fibroblasts.** (A) hTERT-immortalized fibroblasts inducibly expressing GFP-progerin were transfected either with a GFP-expressing (ctrl) or myc-LAP2 $\alpha$  expressing construct on two consecutive days prior to the induction of progerin expression and the cell number was determined on days 6 and 8 post-induction (1.0  $\mu$ g ml<sup>-1</sup> doxycycline, n=3). GFP-Lamin A expressing cells were used as control. (B) Immunofluorescence analysis of myc-Lamin A- (upper panel) and myc-LaminA $\Delta$ K32- (lower panel) expression using  $\alpha$ -myc antibody (grey) and DAPI (blue). Scale bar: 20  $\mu$ m. The percentage indicates transfection efficiency. (C) Immunoblot analysis of total cell lysates of myc-Lamin A- and myc-Lamin $\Delta$ K32-expressing cells using anti-myc and anti-lamin A/C antibodies.  $\gamma$ -tubulin levels served as a loading control. (D) Uninduced cells were transfected either with a control GFP-expressing construct (GFP ctrl), myc-LAP2 $\alpha$ - expressing construct alone or in combination with the myc-Lamin A and myc-LaminA $\Delta$ K32 construct. The level of LAP2 $\alpha$  expression was assessed by immunoblot analysis using anti-LAP2 $\alpha$  specific antibody.
